# Supplementary material for: BAF complexes drive proliferation and block myogenic differentiation in fusion-positive rhabdomyosarcoma
Source: PubMed Central journal article supplement (PMC8626462; doi:10.1038/s41467-021-27176-w), 2021-11-26
Supplement: 41467_2021_27176_MOESM9_ESM.pdf [file 41467_2021_27176_MOESM9_ESM.pdf]

## Reporting Summary

Nature Research wishes to improve the reproducibility of the work that we publish. This form provides structure for consistency and transparency in reporting. For further information on Nature Research policies, see our [Editorial Policies](#) and the [Editorial Policy Checklist](#).

### Statistics

For all statistical analyses, confirm that the following items are present in the figure legend, table legend, main text, or Methods section.

n/a Confirmed

- The exact sample size ( $n$ ) for each experimental group/condition, given as a discrete number and unit of measurement
- A statement on whether measurements were taken from distinct samples or whether the same sample was measured repeatedly
- The statistical test(s) used AND whether they are one- or two-sided  
*Only common tests should be described solely by name; describe more complex techniques in the Methods section.*
- A description of all covariates tested
- A description of any assumptions or corrections, such as tests of normality and adjustment for multiple comparisons
- A full description of the statistical parameters including central tendency (e.g. means) or other basic estimates (e.g. regression coefficient) AND variation (e.g. standard deviation) or associated estimates of uncertainty (e.g. confidence intervals)
- For null hypothesis testing, the test statistic (e.g.  $F$ ,  $t$ ,  $r$ ) with confidence intervals, effect sizes, degrees of freedom and  $P$  value noted  
*Give  $P$  values as exact values whenever suitable.*
- For Bayesian analysis, information on the choice of priors and Markov chain Monte Carlo settings
- For hierarchical and complex designs, identification of the appropriate level for tests and full reporting of outcomes
- Estimates of effect sizes (e.g. Cohen's  $d$ , Pearson's  $r$ ), indicating how they were calculated

*Our web collection on [statistics for biologists](#) contains articles on many of the points above.*

### Software and code

Policy information about [availability of computer code](#)

Data collection

BioRad Image Lab 5.2.1 (Build 11) was used for chemiluminescence detection of Western Blots.  
BioTek Gen5 2.07.17 was used for measurement of colorimetric assays (WST).  
BD LSR Fortessa Cell Analyzer was used to measure flow cytometry data.  
Olympus CKX41 Inverted Microscope was used for phase contrast image acquisition.  
Nikon Eclipse Ti2 was used for Immunofluorescence microscopy.  
Thermo Scientific Orbitrap Fusion Tribrid Mass Spectrometer was used for measurements in BioID experiments.  
Illumina NovaSeq 6000 system was used for RNA-Sequencing (performed by Atlas Biolab GmbH, Berlin, Germany)  
Illumina NextSeq 500 system was used for ChIP-Seq experiments.  
ABI 7900OUT Fast Real-Time PCR System was used for RT-qPCR data acquisition.

Data analysis

Prism 8.0.0 (from GraphPad Software), R (version 3.5.1 from the Foundation for Statistical Computing), or GSEA (version 4.0 from the Broad Institute) were used for statistical analyses. lowJo V10.6.1 software was used to analyze flow cytometry data.  
Lumenera Infinity capture software (V5.0.2) was used to process phase contrast images.  
Nikon NIS-Elements AR5.21.02 (Build 1487) software was used to process immunofluorescence pictures.  
ABI SDS 2.4 software was used for RT-qPCR data processing.  
Protein identification and quantification of BioID experiments were performed using MaxQuant software and Andromeda search engine (see Methods section for detailed information). Gene ontology enrichment analysis was performed using Metascape software (<https://metascape.org/gp/index.html#/main/step1>)  
A custom code for RNA-seq and ChIP-seq analyses is available on github at <https://github.com/GryderArt>.  
BCHNV software: [https://github.com/CBIIT/ChIP\\_seq/blob/master/scripts/runBCHNV.sh](https://github.com/CBIIT/ChIP_seq/blob/master/scripts/runBCHNV.sh)  
CLTRON software: <https://pypi.org/project/coltron/>  
DESeq2 (1.28.1) was used in differential gene analysis.

RNA-seq reads were mapped to the human genome build hg19 by STAR (<https://github.com/alexdobin/STAR>) and quantified using RSEM (<https://deweylab.github.io/RSEM/>). Gene set enrichment was assessed using GSEA software (<https://www.gsea-msigdb.org/gsea/>) and visualized in R (<https://github.com/GryderArt/VisualizeRNAseq>).

ChIP-seq data was mapped to hg19 using BWA. For ChIP-Rx, we additionally mapped spike in reads to dm3 using BWA (version 0.7.17), and normalized human reads to million-mapped Drosophila reads (RRPM, reference normalize reads per million). Peaks were called using MACS2.0, with stringency thresholds of  $p = 0.0000001$  and filtered to remove ENCODE blacklisted regions (satellite repeats and spuriously over-mapped regions). Peak intersections we identified using bedtools intersect, and the resulting heatmaps and metagene plots were plotted using deeptools (<https://deeptools.readthedocs.io/en/develop/>). Genome tracks were visualized in IGV.

For Mass Spectrometry data collection, peak lists were generated using FCC and Proteome Discoverer2.4.

BiolD experiments were quantified by MaxQuant version 1.6.2.3.

For manuscripts utilizing custom algorithms or software that are central to the research but not yet described in published literature, software must be made available to editors and reviewers. We strongly encourage code deposition in a community repository (e.g. GitHub). See the Nature Research [guidelines for submitting code & software](#) for further information.

## Data

Policy information about [availability of data](#)

All manuscripts must include a [data availability statement](#). This statement should provide the following information, where applicable:

- Accession codes, unique identifiers, or web links for publicly available datasets
- A list of figures that have associated raw data
- A description of any restrictions on data availability

For ChIP-Seq data analysis we used the publicly available ENCODE Consortium (<https://sites.google.com/site/anshulkundaje/projects/blacklists>) dataset, as well as two ChIP-seq datasets recently reported (GSE116344, GSE83725; GEO Omnibus) in Fig.4. Additionally, we used gene expression datasets (phs000720 dbGAP) for comparing expression levels of mSWI/SNF subunits in RMS vs. normal muscle tissue for Fig. S1B. In addition we used publicly available cancer dependency datasets (<https://depmap.org/portal/>) to illustrate RMS cell dependency on BRG1 (SMARCA4) compared to other cancer types.

The data sets of RNA-seq and ChIP-seq generated in this study have been deposited in the Gene Expression Omnibus database with accession number GSE162052. The mass spectrometry proteomics data of our BiolD experiments supporting the findings in Figure 2A,B have been deposited to the ProteomeXchange Consortium via the PRIDE90 partner repository with the dataset identifier PXD022187. The mass spectrometry proteomics data of SEC-IP-MS experiments supporting the findings in Figure 2F-H (2F:6LTJ, 2G:6TDA) have been made publicly available and were deposited to the ProteomeXchange Consortium via the MassIVE partner repository with the dataset identifier MSV000086494.

For filtering ChIP-Seq Peaks (Fig. 3E-G, Fig. 4, Fig. 5, Fig. S4, Fig. S5) we used blacklist dataset from the ENCODE Consortium (<https://sites.google.com/site/anshulkundaje/projects/blacklists>).

Mass spectrometry proteomic data of BiolD experiments (Fig. 2A/B, Fig. S2C, Table S2) are available via PRIDE repository with the identifier PXD022187 (Reviewer account details: Username: reviewer\_pxd022187@ebi.ac.uk Password: U0zrLLaH)

Mass spectrometry proteomic data of SEC-IP experiments (Fig. 2F-H) are deposited to the ProteomeXchange Consortium via the MassIVE partner repository with the dataset identifier MSV000086494. (publicly available)

The data sets of RNA-seq (Fig. 3C/E-G, Fig. 4G, Fig. S3A/B, Fig. S4C, Fig. S6h,i) and ChIP-seq (Fig. 3E-G, Fig. 4, Fig. 5, Fig. S4, Fig. S5, Fig.S6) generated in this study have been deposited in the Gene Expression Omnibus database with accession number GSE162052.

A Source Data file is available containing all relevant associated raw data.

## Field-specific reporting

Please select the one below that is the best fit for your research. If you are not sure, read the appropriate sections before making your selection.

- Life sciences       Behavioural & social sciences       Ecological, evolutionary & environmental sciences

For a reference copy of the document with all sections, see [nature.com/documents/nr-reporting-summary-flat.pdf](https://www.nature.com/documents/nr-reporting-summary-flat.pdf)

## Life sciences study design

All studies must disclose on these points even when the disclosure is negative.

|                 |                                                                                                                                                                                                                                                                                                                                          |
|-----------------|------------------------------------------------------------------------------------------------------------------------------------------------------------------------------------------------------------------------------------------------------------------------------------------------------------------------------------------|
| Sample size     | No statistical method for sample size calculations were performed. We have used minimal sample size sufficient to detect biological differences. Numbers of samples are indicated in the figure legends for each panel.                                                                                                                  |
| Data exclusions | Outliers found in technical replicates of Ct-threshold measurements within RT-qPCR experiments (pre-established SD > 0.5) were removed from the analysis.<br>Single measurements of technical replicates within WST-1 measurements had to be excluded due to pipetting errors (see source data file).<br>Otherwise no data was excluded. |
| Replication     | All experiments were performed at least twice, in most cases more than this. All replicates were successful and are included.<br>Number of biological replicates are given where applicable.<br>ChIP-Seq experiments were performed as single replicates.                                                                                |
| Randomization   | Our experiments were not randomized, because we have controls run side-by-side with the experimental samples.                                                                                                                                                                                                                            |

## Reporting for specific materials, systems and methods

We require information from authors about some types of materials, experimental systems and methods used in many studies. Here, indicate whether each material, system or method listed is relevant to your study. If you are not sure if a list item applies to your research, read the appropriate section before selecting a response.

### Materials & experimental systems

| n/a                                 | Involved in the study                                     |
|-------------------------------------|-----------------------------------------------------------|
| <input type="checkbox"/>            | <input checked="" type="checkbox"/> Antibodies            |
| <input type="checkbox"/>            | <input checked="" type="checkbox"/> Eukaryotic cell lines |
| <input checked="" type="checkbox"/> | <input type="checkbox"/> Palaeontology and archaeology    |
| <input checked="" type="checkbox"/> | <input type="checkbox"/> Animals and other organisms      |
| <input checked="" type="checkbox"/> | <input type="checkbox"/> Human research participants      |
| <input checked="" type="checkbox"/> | <input type="checkbox"/> Clinical data                    |
| <input checked="" type="checkbox"/> | <input type="checkbox"/> Dual use research of concern     |

### Methods

| n/a                                 | Involved in the study                              |
|-------------------------------------|----------------------------------------------------|
| <input type="checkbox"/>            | <input checked="" type="checkbox"/> ChIP-seq       |
| <input type="checkbox"/>            | <input checked="" type="checkbox"/> Flow cytometry |
| <input checked="" type="checkbox"/> | <input type="checkbox"/> MRI-based neuroimaging    |

## Antibodies

### Antibodies used

#### For Western Blot:

beta Tubulin (D309W), 86298S, Cell Signaling Technologies. Used as 1/1000 dilution.  
 BRG1 (A52), 3508S, Cell Signaling Technologies. Used as 1/500 dilution.  
 BRM (D9E8B), 11966S, Cell Signaling Technologies. Used as 1/1000 dilution.  
 Cleaved Caspase 7 (D198), 9491S, Cell Signaling Technologies. Used as 1/1000 dilution.  
 Flag (clone M2), F1804, Sigma Aldrich. Used as 1/1000 dilution.  
 FOXO1 (H-128), sc-11350, Santa Cruz Biotechnologies. Used as 1/500 dilution.  
 GAPDH (14C10), 2118L, Cell Signaling Technologies. Used as 1/1000 dilution.  
 MYHC, MF20-c, Developmental Studies Hybridoma Bank. Used as 1/500 dilution.  
 MYCN, 9405S, Cell Signaling Technologies. Used as 1/1000 dilution.  
 PARP (46D11), 9532, Cell Signaling Technologies. Used as 1/1000 dilution.  
 PLK1 (clone 35-206), 05-844, Millipore. Used as 1/500 dilution.  
 SMARCB1/BAF47 (D8M1X), 91735S, Cell Signaling Technologies. Used as 1/1000 dilution.  
 SMARCC1/BAF155 (D7F8S), 11956S, Cell Signaling Technologies. Used as 1/1000 dilution.  
 Strep-HRP, 016-030-084, Jackson ImmunoResearch. Used as 1/500 dilution.  
 anti-mouse HRP, 7076, Cell Signaling Technologies. Used as 1/2000 dilution.  
 anti-rabbit HRP, 7074, Cell Signaling Technologies. Used as 1/2000 dilution.  
 easyBlot anti-mouse HRP, GTX221667-01, GeneTex. Used as 1/1000 dilution.  
 easyBlot anti-rabbit HRP, GTX221666-01, GeneTex. Used as 1/1000 dilution.  
 PBRM1 (BAF180), 91894, Cell Signaling Technologies. Used as 1/1000 dilution.  
 BAF47 (SMARCB1), ab192864, Abcam. Used as 1/1000 dilution.  
 SMARCC2 (D8O9V), 12760S, Cell Signaling Technologies. Used as 1/1000 dilution.  
 SMARCE1 (E6H5J), 33360S, Cell Signaling Technologies. Used as 1/1000 dilution.  
 BRD9, ab137245, Abcam. Used as 1/1000 dilution.  
 DPF2, ab134942, Abcam. Used as 1/1000 dilution.

#### For SEC-IP-MS:

IgG, I5006, Sigma. Used as 3ug in 1 ml dilution.  
 PBRM1 (BAF180), 91894, Cell Signaling Technologies. Used as 3ug in 1 ml dilution.  
 BRG1, ab110641, Abcam. Used as 3ug in 1 ml dilution.

#### For ColP:

BRG1, ab110641, Abcam. Used as 4ug in 2 ml dilution.  
 FOXO1 (C-20), sc-9808, Santa Cruz Biotechnologies. Used as 8ug in 2 ml dilution.

#### For Immunofluorescence:

Flag, F1804, Sigma Aldrich. Used as 1/500 dilution.  
 Strep Alexa-Fluor 594 conjugate, S11227, Thermo Fisher. Used as 1/250 dilution.  
 MHC, MF20-c, Developmental Studies Hybridoma Bank. Used as 1/50 dilution.  
 Alexa-Fluor 488 goat anti-mouse, A11029, Thermo Fisher. Used as 1/250 dilution.  
 Alexa-Fluor 594 goat anti-mouse, A11032, Thermo Fisher. Used as 1/250 dilution.

#### For ChIP:

## Validation

BRG1, ab110641, Abcam: used 4 ug antibody in 350uL reaction volume.  
 H3K27ac, 39133, Active Motif: used 4 ug antibody in 350uL reaction volume.  
 MYCN (NCM-II 100), MA1-170, Thermo Fisher: used 7 ug antibody in 350uL reaction volume.  
 SMARCC1, ab172638, Abcam: used 4 ug antibody in 350uL reaction volume.  
 Drosophila Spike-in Antibody, 61686, Active Motif: used 2 ug antibody in 350uL reaction volume (for 25 ug of chromatin sample).  
 BRD9, ab137245, Abcam: used 4 ug antibody in 700uL reaction volume.  
 DPF2, ab134942, Abcam: used 4 ug antibody in 700uL reaction volume.  
 PBRM1, 61381, Active Motif: used 4 ug antibody in 700uL reaction volume.

Validation data for the application Western Blot for all the following antibodies from CellSignaling is available on the CellSignaling homepage:

beta Tubulin (D309W), 86298S, Cell Signaling Technologies:  $\beta$ -Tubulin (D3U1W) Mouse mAb recognizes endogenous levels of total  $\beta$ -tubulin protein, and reactive to human, mouse, rat, hamster, and monkey  $\beta$ -Tubulin.

BRG1 (A52), 3508S, Cell Signaling Technologie: Brg1 (A52) Antibody detects endogenous levels of Brg1 protein in human, mouse and Monkey.

BRM (D9E8B), 11966S, Cell Signaling Technologies: BRM (D9E8B) XP<sup>®</sup> Rabbit mAb recognizes endogenous levels of total BRM protein in human and Monkey. This antibody does not cross-react with BRG1 protein.

Cleaved Caspase 7 (D198), 9491S, Cell Signaling Technologies: Cleaved Caspase-7 (Asp198) Antibody detects endogenous levels of the large fragment of caspase-7 resulting from cleavage at aspartic acid 198 for human, mouse, rat, and Monkey. The antibody does not cross-react with full length caspase-7 or with other caspases.

GAPDH (14C10), 2118L, Cell Signaling Technologies: GAPDH (14C10) Rabbit mAb detects endogenous levels of total GAPDH protein in human, mouse, rat, Monkey, Bobine, and pig.

MYCN, 9405S, Cell Signaling Technologies: N-Myc Antibody detects endogenous levels human N-Myc . It does not cross-react with other Myc family members.

PARP (46D11), 9532, Cell Signaling Technologies: PARP (46D11) Rabbit mAb detects endogenous levels of total full-length PARP-1 and the large fragment (89 kDa) produced by caspase cleavage at Asp214 in human, mouse, rat and Monkey. This antibody does not cross-react with PARP-2 and PARP-3.

SMARCB1/BAF47 (D8M1X), 91735S, Cell Signaling Technologies:SMARCB1/BAF47 (D8M1X) Rabbit mAb recognizes endogenous levels of total SMARCB1/BAF47 protein in human, mouse, rat, and monkey.

SMARCC1/BAF155 (D7F8S), 11956S, Cell Signaling Technologies: SMARCC1/BAF155 (D7F8S) Rabbit mAb recognizes endogenous levels of total SMARCC1/BAF155 protein in human, mouse, rat, and monkey.

anti-mouse HRP, 7076, Cell Signaling Technologies: horse anti-mouse IgG, HRP-linked antibody

anti-rabbit HRP, 7074, Cell Signaling Technologies: goat anti-rabbit IgG, HRP-linked Antibody

PBRM1 (BAF180), 91894, Cell Signaling Technologies: PBRM1 (D3F7O) Rabbit mAb recognizes endogenous levels of total PBRM1 protein in human, mouse, rat and monkey.

PLK1 (clone 35-206), 05-844, Millipore, was used in numerous publications for Western Blot listed on the manufacturers website ([https://www.emdmillipore.com/US/en/product/Anti-PLK1-Antibody-clone-35-206,MM\\_NF-05-844?ReferrerURL=https%3A%2F%2Fwww.google.com%2F](https://www.emdmillipore.com/US/en/product/Anti-PLK1-Antibody-clone-35-206,MM_NF-05-844?ReferrerURL=https%3A%2F%2Fwww.google.com%2F)).

FOXO1 (H-128; Santa Cruz Biotechnology sc-11350) was used in numerous publications for Western Blot listed on the SantaCruz website (<https://www.scbt.com/p/fkhr-antibody-h-128>)

MHC, MF-20 c, Developmental Studies Hybridoma bank, was used in numerous publications for Western Blot listed on the Developmental Studies Hybridoma Bank website (<https://dshb.biology.uiowa.edu/MF-20>)

For BAF47 (SMARCB1), ab192864, Abcam, validation data for Western Blot is available on the manufacturers website. Abpromise guarantee this product for flow cytometry, IHC-P, IP, and WB.

Antibodies used for Immunoprecipitation:

For BRG1, ab110641, Abcam, numerous publications for Immunoprecipitation and ChIP are listed on the manufacturers homepage.

For PBRM1 (BAF180), 91894, Cell Signaling Technologies, validation data for Immunoprecipitation is available on the manufacturers website

The use of FOXO1 (C-20), sc-9808, Santa Cruz Biotechnologies, for CoIP has been validated by the group of authors (Böhm, JCI, 2016)

Validation data for the application ChIP for all the following antibodies from Active Motif is available on the CellSignaling homepage:

H3K27ac, 39133, Active Motif

Drosophila Spike-in Antibody, 61686, Active Motif

PBRM1, 61381, Active Motif

For SMARCC1, ab172638, Abcam, validation data for the application ChIP is available on the manufacturers website

The following antibodies from Abcam have been used for ChIP in publications listed on the manufacturers website

BRG1, ab110641, Abcam

BRD9, ab137245, Abcam

DPF2, ab134942, Abcam

MYCN (NCM-II 100), MA1-170, Thermo Fisher has been chosen based on publications using the same clone by different vendors (Abcam, publications listed on webpage) for its superior concentration. Results using this antibody were validated using previously described MYCN binding sites in RMS cells (Gryder, Cancer Discovery, 2017) by ChIP-qPCR.

MHC, MF-20 c, Developmental Studies Hybridoma bank, was used in numerous publications for immunofluorescence listed on the Developmental Studies Hybridoma Bank website.

## Eukaryotic cell lines

Policy information about [cell lines](#)

|                                                                      |                                                                                                                                                                                                                                                                                                                                                                                                                         |
|----------------------------------------------------------------------|-------------------------------------------------------------------------------------------------------------------------------------------------------------------------------------------------------------------------------------------------------------------------------------------------------------------------------------------------------------------------------------------------------------------------|
| Cell line source(s)                                                  | The cell lines RH4, RHJT, RH36 are all provided by Peter Houghton, Greehey Children's Cancer Research Institute, San Antonio, Texas, USA. RH5 cells were provided by Susan Ragsdale, St. Jude Children's Hospital, Memphis, TN. RH30, RD as well as HEK293T cells were purchased through ATCC. SMS-CTR cells were originally established by Patrick Reynolds, University of Texas Health Science Center, Dallas, Texas. |
| Authentication                                                       | All cell lines were authenticated by short tandem repeat analysis (STR profiling) and positively matched with reference data.                                                                                                                                                                                                                                                                                           |
| Mycoplasma contamination                                             | Cell lines were regularly tested for Mycoplasma and were Mycoplasma free.                                                                                                                                                                                                                                                                                                                                               |
| Commonly misidentified lines<br>(See <a href="#">ICLAC</a> register) | None as far as we know.                                                                                                                                                                                                                                                                                                                                                                                                 |

## ChIP-seq

### Data deposition

Confirm that both raw and final processed data have been deposited in a public database such as [GEO](#).

Confirm that you have deposited or provided access to graph files (e.g. BED files) for the called peaks.

Data access links  
*May remain private before publication.* ChIP-seq data generated in this study have been deposited in the Gene Expression Omnibus database with accession number GSE162052.

Files in database submission Raw sequencing files (.fastq) and peak files (.bed) are available for the following samples:

RH4\_DMSO\_4h\_BRG1  
 RH4\_Ent\_4h\_BRG1  
 RH4\_DMSO\_4h\_PBRM1  
 RH4\_Ent\_4h\_PBRM1  
 RH4\_sgScr\_input  
 RH4\_sgScr\_BRG1  
 RH4\_sgScr\_HDAC2  
 RH4\_sgScr\_H3K27ac  
 RH4\_sgScr\_H3K9ac  
 RH4\_sgBRG1\_input  
 RH4\_sgBRG1\_BRG1  
 RH4\_sgBRG1\_HDAC2  
 RH4\_sgBRG1\_H3K27ac  
 RH4\_sgBRG1\_H3K9ac  
 RH4\_BRD9  
 RH4\_DPF2  
 RH4\_cis\_7d\_BRG1  
 RH4\_cis\_7d\_SMARCC1  
 RH4\_cis\_7d\_H3K27ac  
 RH4\_ACBI1\_7d\_BRG1  
 RH4\_ACBI1\_7d\_SMARCC1  
 RH4\_ACBI1\_7d\_H3K27ac  
 RH4\_sgScr\_SMARCC1  
 RH4\_sgBRG1\_SMARCC1  
 RH4\_cis\_7d\_MYCN\_r2  
 RH4\_ACBI1\_7d\_MYCN\_r2  
 RH4\_sgScr\_MYCN\_r2  
 RH4\_sgBRG1\_MYCN\_r2

Genome browser session  
(e.g. [UCSC](#)) No longer applicable.

## Methodology

Replicates Experiments were performed as single replicates

|                         |                                                                                                                                                                                                                                                                                                                                                                                                                                                                                                                                                                                                                                                                                                                                                                                                                                                                                                                                                                                                                                                                                                                                                                                                                                                                                                                                                                             |
|-------------------------|-----------------------------------------------------------------------------------------------------------------------------------------------------------------------------------------------------------------------------------------------------------------------------------------------------------------------------------------------------------------------------------------------------------------------------------------------------------------------------------------------------------------------------------------------------------------------------------------------------------------------------------------------------------------------------------------------------------------------------------------------------------------------------------------------------------------------------------------------------------------------------------------------------------------------------------------------------------------------------------------------------------------------------------------------------------------------------------------------------------------------------------------------------------------------------------------------------------------------------------------------------------------------------------------------------------------------------------------------------------------------------|
| Sequencing depth        | All samples were sequenced with a total read count of 25-30 millions.<br>Readlength in all samples was 75bp and sequencing was performed as single-end.                                                                                                                                                                                                                                                                                                                                                                                                                                                                                                                                                                                                                                                                                                                                                                                                                                                                                                                                                                                                                                                                                                                                                                                                                     |
| Antibodies              | BRG1, ab110641, Abcam<br>H3K27ac, 39133, Active Motif<br>H3K9ac, Cell Signaling Technologies, 9649<br>HDAC2, Abcam, ab7029<br>MYCN (NCM-II 100), MA1-170, Thermo Fisher<br>SMARCC1, ab172638, Abcam<br>Drosophila Spike-in Antibody, 61686, Active Motif<br>BRD9, ab137245, Abcam<br>DPF2, ab134942, Abcam<br>PBRM1, 61381, Active Motif                                                                                                                                                                                                                                                                                                                                                                                                                                                                                                                                                                                                                                                                                                                                                                                                                                                                                                                                                                                                                                    |
| Peak calling parameters | ChIP-seq data was mapped to hg19 using BWA. For ChIP-Rx, we additionally mapped spike in reads to dm3 using BWA, and normalized human reads to million-mapped Drosophila reads (RRPM, reference normalize reads per million). Peaks were called using MACS2.0, with stringency thresholds of $p = 0.0000001$ and filtered to remove ENCODE blacklisted regions (satellite repeats and spuriously over-mapped regions). Peak intersections were identified using bedtools intersect, and the resulting heatmaps and metagene plots were plotted using deeptools ( <a href="https://deeptools.readthedocs.io/en/develop/">https://deeptools.readthedocs.io/en/develop/</a> ). Genome tracks were visualized in IGV.                                                                                                                                                                                                                                                                                                                                                                                                                                                                                                                                                                                                                                                           |
| Data quality            | <pre> SampleFile  PEAKS_PVALUE7 PEAKS_FOLD_CHANGE5 Sample_RH4_DMSO_4h_BRG1_040_C_HKLNMBGX9 15991 14811 Sample_RH4_Ent_4h_BRG1_040_C_HKLNMBGX9 25445 23976 Sample_RH4_DMSO_4h_PBRM1_040_C_HKLNMBGX9 19837 19376 Sample_RH4_Ent_4h_PBRM1_040_C_HMFTFBGX7 43050 42106 Sample_RH4_sgScr_BRG1_C_H7HJ5BGXC 54372 49046 Sample_RH4_sgScr_HDAC2_C_H7HJ5BGXC 42691 36683 Sample_RH4_sgScr_H3K27ac_C_H7HJ5BGXC 55373 34389 Sample_RH4_sgScr_H3K9ac_C_H7JYLBGXC 44138 40106 Sample_RH4_sgBRG1_BRG1_C_H7JYLBGXC 16089 14506 Sample_RH4_sgBRG1_HDAC2_C_H7JYLBGXC 4726 3741 Sample_RH4_sgBRG1_H3K27ac_C_H7JYLBGXC 60474 55872 Sample_RH4_sgBRG1_H3K9ac_C_H7JYLBGXC 48605 44026 Sample_RH4_BRD9_200413_C_BZS 21092 18179 Sample_RH4_DPF2_200413_C_BZS 23786 19840 Sample_RH4_cis_7d_BRG1_C_HM35YBGXF 209485 196812 Sample_RH4_cis_7d_SMARCC1_C_HM35YBGXF 59907 57914 Sample_RH4_cis_7d_H3K27ac_C_HM35YBGXF 50960 47669 Sample_RH4_ACBI1_7d_BRG1_C_HM35YBGXF 503834 468047 Sample_RH4_ACBI1_7d_SMARCC1_C_HM35YBGXF 98672 94203 Sample_RH4_ACBI1_7d_H3K27ac_C_HM35YBGXF 43674 40961 Sample_RH4_sgScr_SMARCC1_C_HM35YBGXF 71696 69184 Sample_RH4_sgBRG1_SMARCC1_C_HM35YBGXF 61163 59035 Sample_RH4_cis_7d_MYCN_r2_C_HM35YBGXF 2567 2119 Sample_RH4_ACBI1_7d_MYCN_r2_C_HM35YBGXF 1958 1595 Sample_RH4_sgScr_MYCN_r2_C_HM35YBGXF 802 653 Sample_RH4_sgBRG1_MYCN_r2_C_HM35YBGXF 3167 2683 </pre> |
| Software                | ChIP-seq data was mapped to hg19 using BWA. For ChIP-Rx, we additionally mapped spike in reads to dm3 using BWA, and normalized human reads to million-mapped Drosophila reads (RRPM, reference normalize reads per million). Peaks were called using MACS2.0, with stringency thresholds of $p = 0.0000001$ and filtered to remove ENCODE blacklisted regions (satellite repeats and spuriously over-mapped regions). Peak intersections were identified using bedtools intersect, and the resulting heatmaps and metagene plots were plotted using deeptools ( <a href="https://deeptools.readthedocs.io/en/develop/">https://deeptools.readthedocs.io/en/develop/</a> ). Genome tracks were visualized in IGV.                                                                                                                                                                                                                                                                                                                                                                                                                                                                                                                                                                                                                                                           |

## Plots

Confirm that:

- The axis labels state the marker and fluorochrome used (e.g. CD4-FITC).
- The axis scales are clearly visible. Include numbers along axes only for bottom left plot of group (a 'group' is an analysis of identical markers).
- All plots are contour plots with outliers or pseudocolor plots.
- A numerical value for number of cells or percentage (with statistics) is provided.

## Methodology

Sample preparation

All flow cytometry experiments were performed on cell lines.

For competition assays, Cas9 expressing RH4 cells (GFP positive) were plated in 24-well format and transduced the next day with sgRNA carrying lentiviruses (with RFP reporter). 2 days after transduction, transduced cells were mixed with same amount of untransduced cells. Part of the resulting mixture was directly used for baseline flow cytometry measurements, while the rest was kept in culture. For flow cytometry analysis, cells were fixed with 0.5% Paraformaldehyde/1xPBS and washed twice in 1xPBS. After resuspension of cell pellets in 1xPBS, samples were analyzed.

For cell cycle analysis, Cas9 expressing RH4 cells were transduced with indicated sgRNAs. Cells were harvested by trypsinization, washed in 1xPBS, fixed in 70% ice-cold Ethanol and incubated at -20°C for at least 2 hours. Before flow cytometry, cells were washed by PBS and resuspended in 500µl PI solution (Table S5F). Data were processed by FlowJo V10.6.1 software using Dean-Jett-Fox model to assign cell cycle phases.

Instrument

Flow cytometry data was collected with BD LRS Fortessa Cell Analyzer

Software

Flow cytometry data was analyzed using BD FlowJo V10.6.1 software

Cell population abundance

Sorted RH4 Cas9 NG cells were regularly checked for GFP positivity compared to RH4 WT cells, which remained stable over time (>95% positive).

Gating strategy

In all experiments, gating was performed to include live cells only (SSC-A/FSC-A). Of this population, single cells were extracted (FSC-H/FSC-A). According to the different experiments, BFP, RFP and PI signal intensities were determined. For boundary determination using fluorescent proteins, gating was adjusted according to untransduced cells. For detailed information see Source Data file.

- Tick this box to confirm that a figure exemplifying the gating strategy is provided in the Supplementary Information.
